# Supplementary material for: Apabetalone Downregulates Fibrotic, Inflammatory and Calcific Processes in Renal Mesangial Cells and Patients with Renal Impairment
Source: MDPI journal article supplement (doi:10.3390/biomedicines11061663), 2023-06-08
Supplement: s1 [file s1]

**Gilham et al. Apabetalone Downregulates Fibrotic, Inflammatory and Calcific Processes in Renal Mesangial Cells and Patients with Renal Impairment**

**Supplemental Table S1:** TaqMan Assay IDs used in this study (obtained from ThermoFisher Scientific)

| Gene         | Protein                                  | TaqMan Assay ID |
|--------------|------------------------------------------|-----------------|
| <i>ACTA2</i> | Alpha smooth muscle actin                | Hs05005341_m1   |
| <i>THBS1</i> | Thrombospondin 1                         | Hs00962908_m1   |
| <i>FN1</i>   | Fibronectin                              | Hs01549976_m1   |
| <i>POSTN</i> | Periostin                                | Hs01566750_m1   |
| <i>SPARC</i> | SPARC or Osteonectin                     | Hs00277762_m1   |
| <i>IL6</i>   | Interleukin-6                            | Hs00174131_m1   |
| <i>IL1B</i>  | Interleukin-1 beta                       | Hs00174097_m1   |
| <i>PTGS2</i> | Cyclooxygenase 2                         | Hs00153133_m1   |
| <i>ALPL</i>  | Tissue non-specific alkaline phosphatase | Hs01029144_m1   |
| <i>PPIA</i>  | Cyclophilin A                            | 4326316E        |
