# Supplementary material for: Apabetalone Downregulates Fibrotic, Inflammatory and Calcific Processes in Renal Mesangial Cells and Patients with Renal Impairment
Source: MDPI journal article supplement (doi:10.3390/biomedicines11061663), 2023-06-08
Supplement: s1 [file s1]

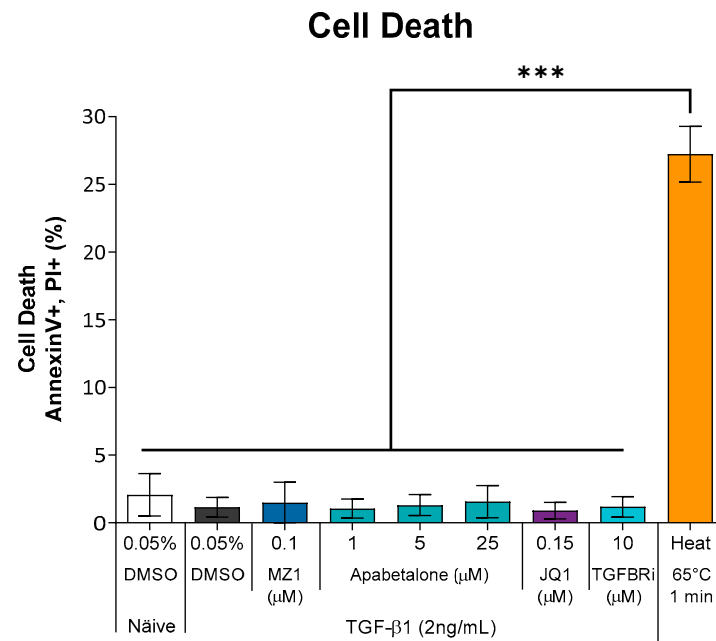

**Supplemental Figure S1:** Assessment of toxicity of treatments to HRMCs. HRMC were treated for 24 h followed by analysis of toxicity by annexin V and propidium iodide staining using flow cytometry. One group was exposed to 65°C for 1 minute to induce cell death. Data represent the mean  $\pm$  standard deviation of 3 independent experiments. Statistical analysis by one-way ANOVA followed by Tukey's Multiple Comparison Test. \*\*\*p<0.001 between groups. TGF- $\beta$ 1: Transforming growth factor  $\beta$ 1. TGFBRi: small molecule inhibitor of the TGF- $\beta$  receptor. Apabetalone: BD2-selective BET inhibitor. JQ1: pan-BET inhibitor. MZ1: PROTAC that directs BET proteins for degradation. PI: propidium iodide.

**A.**

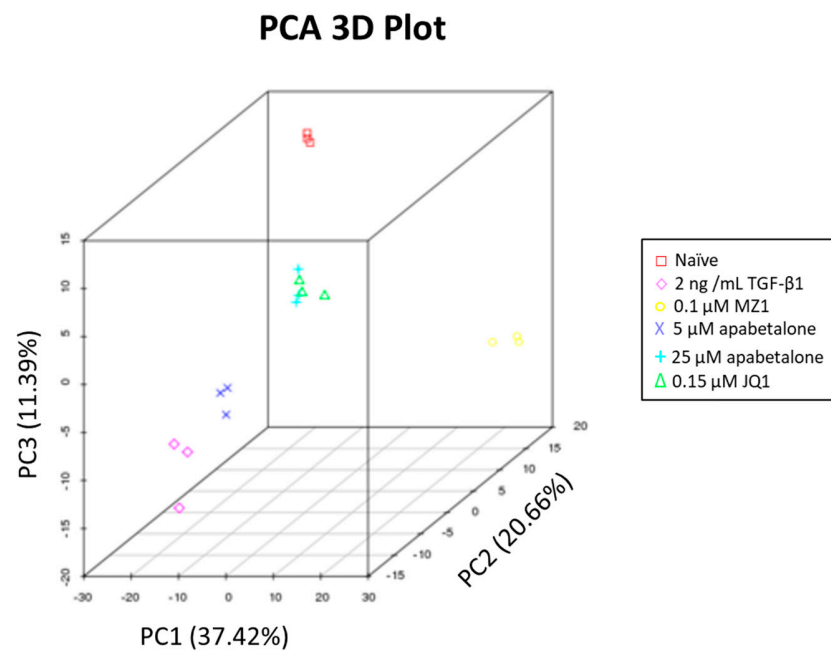

**B:**

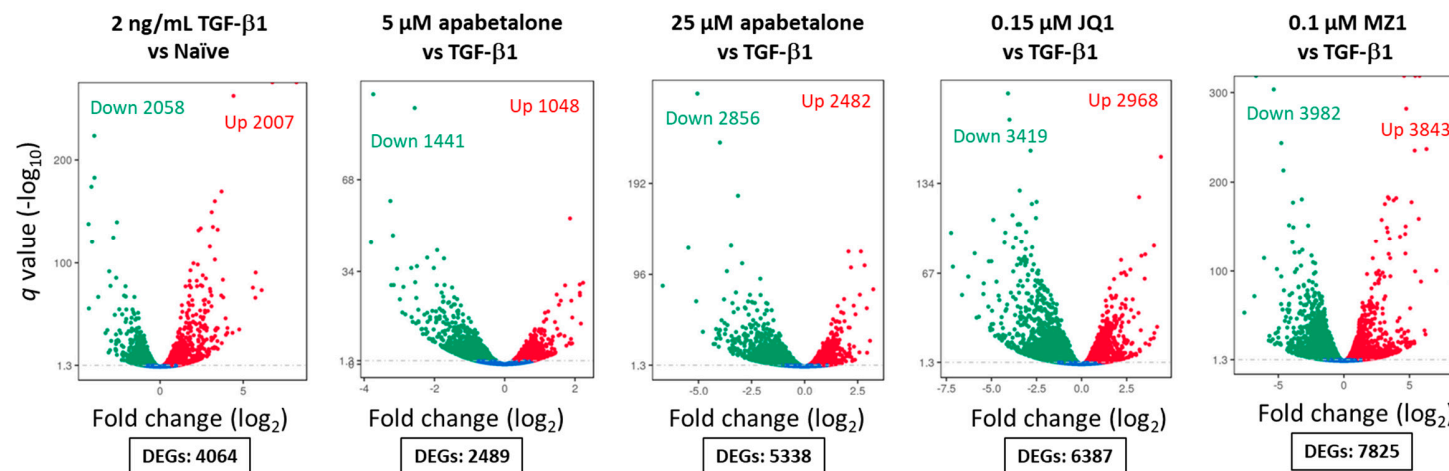

**Supplemental Figure S2:** TGF- $\beta$ 1 stimulation with and without BETi cotreatments result in unique transcriptional signatures **(A)** Principal component analysis (PCA) for Naïve, TGF- $\beta$ 1 stimulated, and TGF- $\beta$ 1 + BETi treated samples. PCA was completed by DESeq2 R package and

shows differentiation between treatment groups. **(B)** Volcano plots of differential gene expression (DEG; significance cutoff:  $p_{adj} < 0.05$ ). Horizontal axis indicates the magnitude of change in gene expression. Vertical axis indicates the Benjamini-Hochberg adjusted p-values. Each dot represents a gene; blue dots indicate no significant difference in expression; red dots indicate upregulated genes; green dots indicate downregulated genes. TGF- $\beta$ 1: Transforming growth factor  $\beta$ 1. Apabetalone: BD2-selective BET inhibitor. JQ1: pan-BET inhibitor. MZ1: PROTAC that directs BET proteins for degradation. DEGs: differentially expressed genes.
